# Supplementary material for: Hollow-Channel Paper Analytical Devices Supported Biofuel Cell-Based Self-Powered Molecularly Imprinted Polymer Sensor for Pesticide Detection
Source: MDPI journal article supplement (doi:10.3390/bios12110974), 2022-11-05
Supplement: s1 [file s1]

*Supporting Information*

# **Hollow-Channel Paper Analytical Devices Supported Biofuel Cell-Based Self-Powered Molecularly Imprinted Polymer Sensor for Pesticide Detection**

**Yanhu Wang <sup>1,2,\*</sup>, Huihui Shi <sup>2</sup>, Jiantao Sun <sup>3</sup>, Jianjian Xu <sup>4</sup>, Mengchun Yang <sup>1</sup> and Jinghua Yu <sup>2</sup>**

<sup>1</sup> Shandong Analysis and Test Center, Qilu University of Technology (Shandong Academy of Sciences), Jinan 250014, China

<sup>2</sup> School of Chemistry and Chemical Engineering, University of Jinan, Jinan 250022, China

<sup>3</sup> Shandong Institute for Product Quality Inspection, Jinan 250102, China

<sup>4</sup> Department of Food and Drug, Weihai Ocean Vocational College, Weihai 264300, China

\* Correspondence: chm\_wangyh@qlu.edu.cn

**This supporting information includes:**

**Reagents and Materials.**

**Figures S1 to S8.**

**Scheme S1.**

## Reagents and Materials

All reagents were of analytical-reagent grade and directly used for the following experiments as supplied. Ultrapure water obtained from a Millipore water purification system ( $\geq 18.2 \text{ M}\Omega \cdot \text{cm}$ , Milli-Q, Millipore) was used in all assays and solutions. Pyrrole (Py) and glucose oxidase (GOx) were purchased from Sigma-Aldrich. GOx-labeled 2,4-D (GOx-2,4-D) was obtained from Zhengzhou Biocell Biotechnology Co., Ltd. (China). Bilirubin oxidase (BOD) from *Myrothecium verrucaria* (E.C.1.10.3.2, 6 Umg-1) was purchased from Sigma. Carbon nanotubes (CNTs) were purchased from Shenzhen Nanotech. Port. Co. Ltd. (Shenzhen, China) without further purification. Tetrachloroauric acid ( $\text{HAuCl}_4$ ) and sodium citrate was purchased from Sinopharm Chemical Reagent Co. Ltd. Whatman chromatography paper #1 (58.0 cm  $\times$  68.0 cm) was obtained from GE Healthcare Worldwide (Pudong Shanghai, China) and used with further adjustment of size (A4 size).

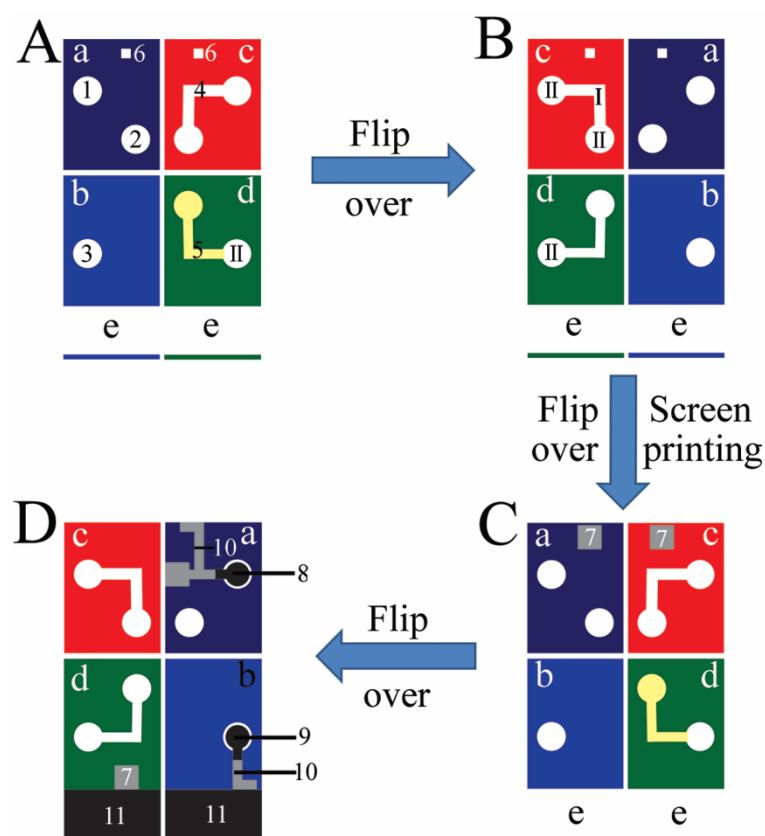

**Figure S1.** Schematic representation of this 3D-μ-MOBFCAD. (A) Wax patterns of this 3D-μ-MOBFCAD; (B) the reverse side of (A); (C) Right side of 3D-μ-MOBFCAD the after screen-printing of silver wire and carbon electrode; (D) the reverse side of (C). (a) cathodic tab; (b) anodic tab; (c) hollow-channel tab; (d) hemichannel tab; (e) unprinted paper for paper supercapacitor. (1) cathodic zone; (2) sample inlet; (3) anodic zone; (4) hollow-channel; (5) hemichannel; (6) via hole; (7) sliver pad; (8) screen-printed cathodic electrode (SPCE); (9) screen-printed anodic electrode (SPAEC); (10) silver wire; (11) paper supercapacitor. (I, II) hollow area.

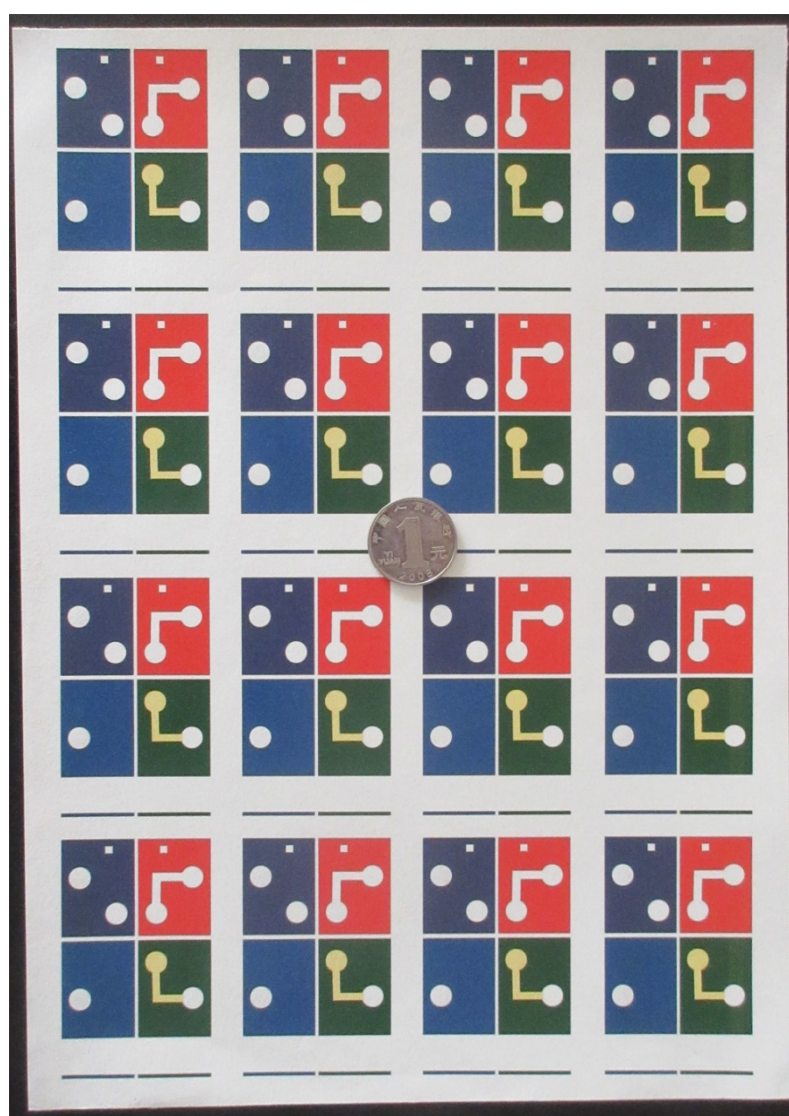

**Figure S2.** Wax-patterns of 3D- $\mu$ -MOBFCAD on a paper sheet (A4) before baking.

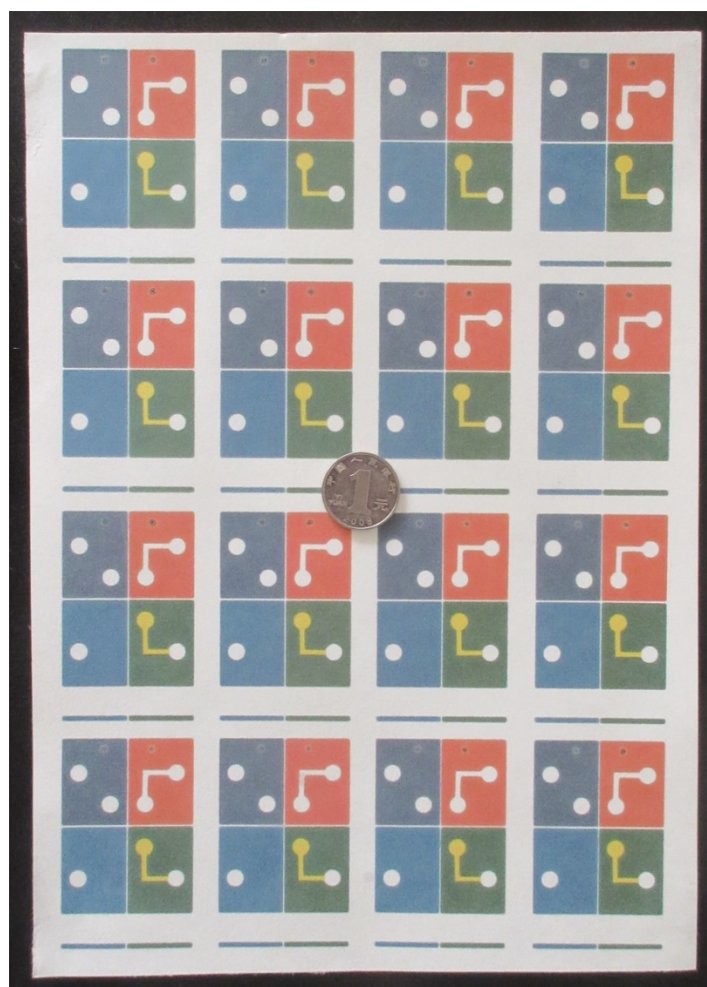

**Figure S3.** Right side of the baked wax-patterns of 3D- $\mu$ -MOBFCAD on a paper sheet (A4) after dropping CNT/Au on via hole.



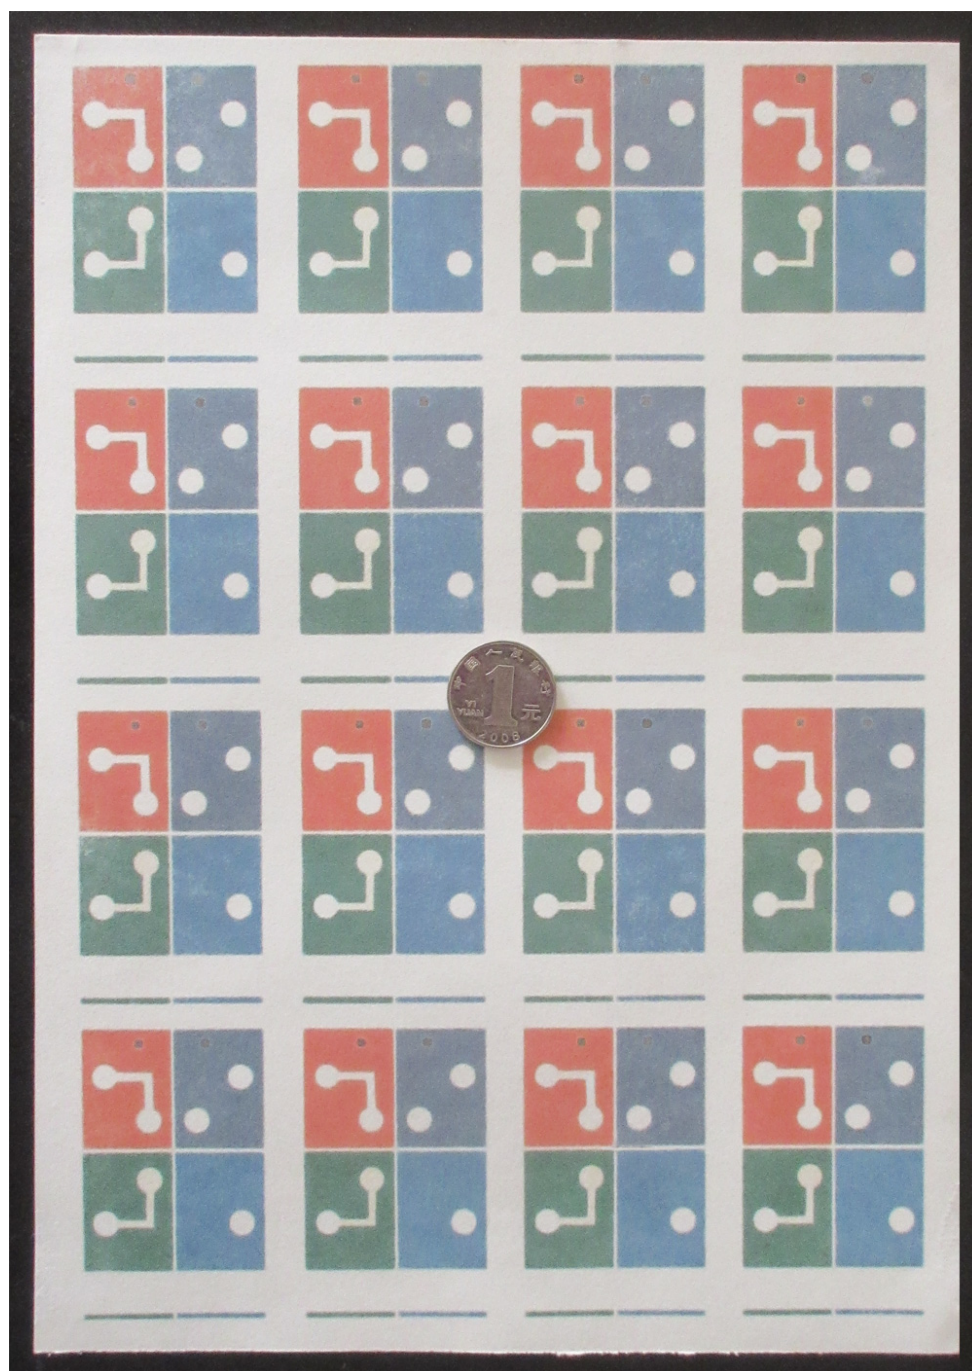

**Figure S4.** Reverse side of the baked wax-patterns of 3D- $\mu$ -MOBFCAD on a paper sheet (A4) after dropping CNT/Au on via hole.

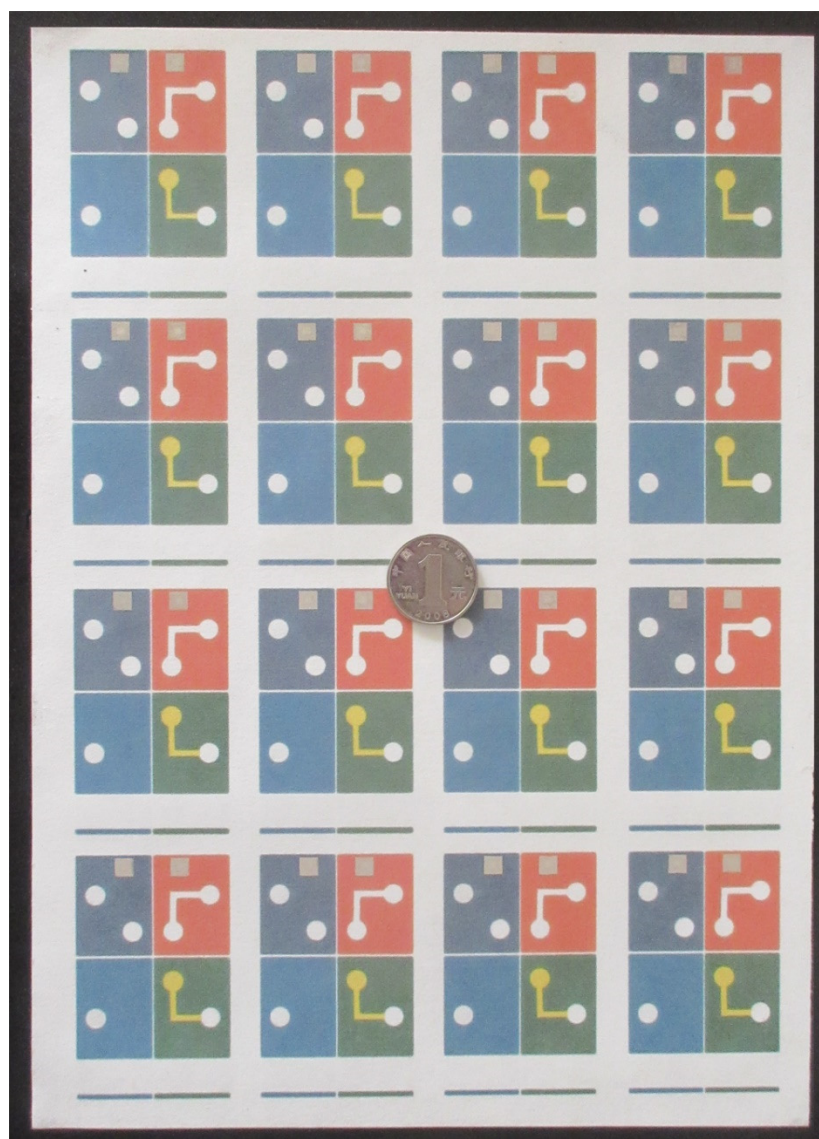

**Figure S5.** Right side of the 3D- $\mu$ -OBFCAD on a paper sheet (A4) after screen-printing of carbon electrodes, silver wire and drawing of graphite electrodes.



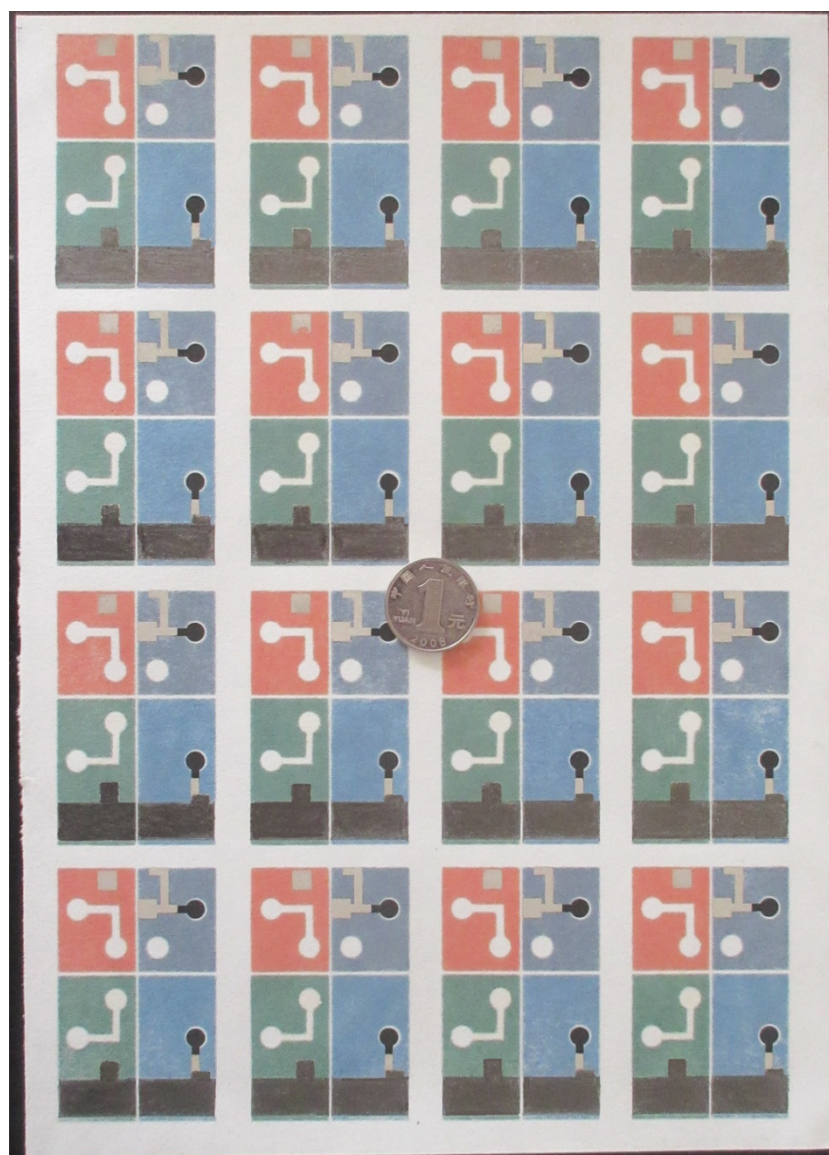

**Figure S6.** Reverse side of the 3D- $\mu$ -OBFCAD on a paper sheet (A4) after screen-printing of carbon electrodes, silver wire and drawing of graphite electrodes.



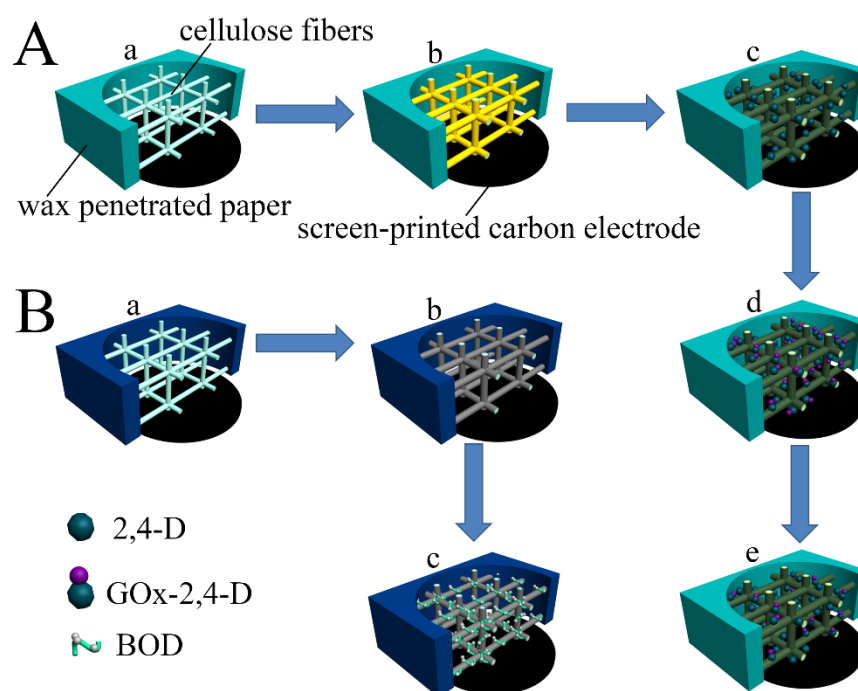

**Scheme S1.** Schematic diagram of the fabrication of bioanode (A) and biocathode (B), different part in (A) represents PAE (a), Au-PAE (b), MIPs-Au-PAE (c), GOx-2,4-D occupied MIPs-Au-PAE (d), and detection of 2,4-D at MIPs-Au-PAE; different part in (B) represents PCE (a), CNT-PCE (b), and BOD-CNT-PCE (c).

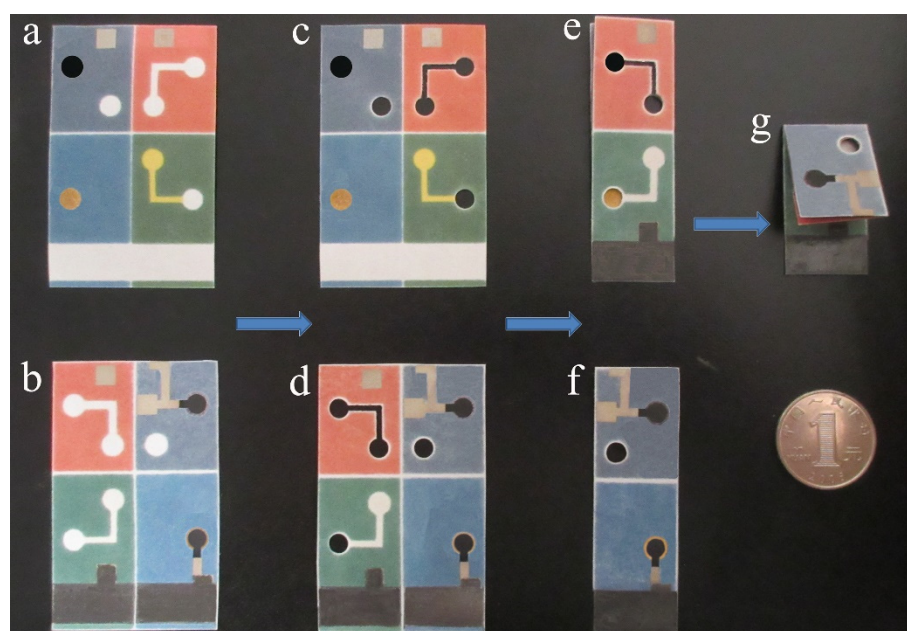

**Figure S7.** Schematic Representation, Size, Shape and Folding Procedure of the Wax Patterns on This 3D-μ-OBFCAD.

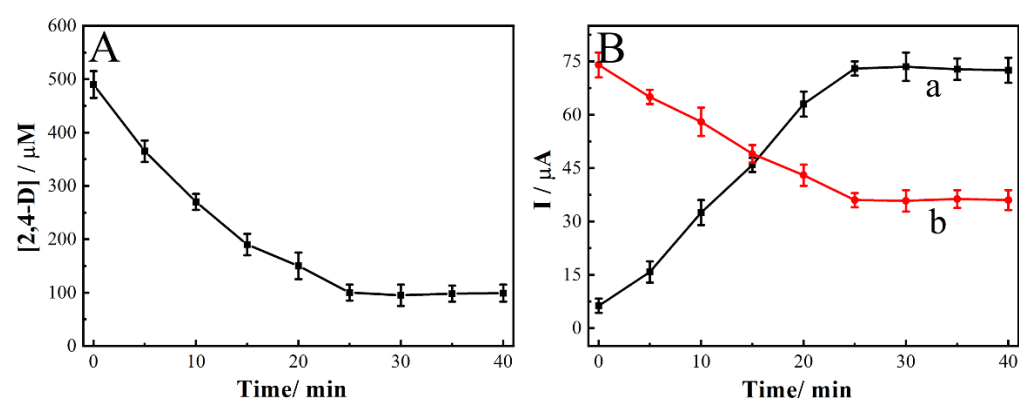

**Figure S8.** (A) Optimization conditions of blocking time in eluted MIP-grafted Au-PAE; (B) effects of (a) labeling time and (b) competition time in MIP-grafted Au-PAE.
